# Supplementary material
Source: PubMed Central journal article supplement (PMC3085584)
Supplement: NIHMS280005-supplement-01.pdf [file NIHMS280005-supplement-01.pdf]

| Gene Symbol | uniProt Id | Sequence Name                                                           | TM Normalized<br>SC | Urine<br>Normalized SC |
|-------------|------------|-------------------------------------------------------------------------|---------------------|------------------------|
| FN1         | P02751     | Fibronectin                                                             | 2447.53             | 31.75                  |
| KRT1        | P04264     | Keratin, type II cytoskeletal 1                                         | 503.09              | 69.85                  |
| KRT9        | P35527     | Keratin, type I cytoskeletal 9                                          | 489.61              | 35.5                   |
| HSPG2       | P98160     | Basement membrane-specific heparan sulfate proteoglycan<br>core protein | 420.76              | 56.74                  |
| COL12A1     | Q99715     | Collagen alpha-1(XII) chain                                             | 308.47              | 1.69                   |
| KRT10       | P13645     | Keratin, type I cytoskeletal 10                                         | 292.7               | 69.78                  |
| MFGE8       | Q08431     | Lactadherin                                                             | 244.3               | 4.72                   |
| A2M         | P01023     | Alpha-2-macroglobulin                                                   | 267.99              | 19.23                  |
| KRT2        | P35908     | Keratin, type II cytoskeletal 2 epidermal                               | 206.83              | 37.74                  |
| ANXA2       | P07355     | Annexin A2                                                              | 103.57              | 80.76                  |
| COL1A2      | P08123     | Collagen alpha-2(I) chain                                               | 96.4                | 1.7                    |
| EMILIN1     | Q9Y6C2     | EMILIN-1                                                                | 98.39               | 0                      |
| ANXA6       | P08133     | Annexin A6                                                              | 78.22               | 43.23                  |
| PKM2        | P14618     | Pyruvate kinase isozymes M1/M2                                          | 72.22               | 90.29                  |
| MVP         | Q14764     | Major vault protein                                                     | 77.37               | 11.93                  |
| ALB         | P02768     | Serum albumin                                                           | 77.78               | 107.67                 |
| LGALS3BP    | Q08380     | Galectin-3-binding protein                                              | 79                  | 48.18                  |
| ANXA5       | P08758     | Annexin A5                                                              | 70.18               | 53.52                  |
| FLNA        | P21333     | Filamin-A                                                               | 68.79               | 1.16                   |
| ANXA1       | P04083     | Annexin A1                                                              | 63.82               | 75.94                  |
| KRT6B       | P04259     | Keratin, type II cytoskeletal 6B                                        | 70.01               | 30.24                  |
| EDIL3       | O43854     | EGF-like repeat and discoidin I-like domain-containing protein 3        | 63.97               | 0.33                   |
| MYOC        | Q99972     | Myocilin                                                                | 67.6                | 0.33                   |
| MYH9        | P35579     | Myosin-9                                                                | 58.92               | 38                     |
| GAPDH       | P04406     | Glyceraldehyde-3-phosphate dehydrogenase                                | 54.58               | 110.8                  |
| MYOF        | Q9NZM1     | Myoferlin                                                               | 51.48               | 18.71                  |
| THBS1       | P07996     | Thrombospondin-1                                                        | 56.9                | 11.96                  |
| KRT6C       | P48668     | Keratin, type II cytoskeletal 6C                                        | 58.51               | 28.45                  |
| LAMA4       | Q16363     | Laminin subunit alpha-4                                                 | 56.17               | 0                      |
| NT5E        | P21589     | 5'-nucleotidase                                                         | 50.81               | 1.98                   |
| CLTC        | Q00610     | Clathrin heavy chain 1                                                  | 47.1                | 30.14                  |
| ENO1        | P06733     | Alpha-enolase                                                           | 45.46               | 178.5                  |
| LTBP2       | Q14767     | Latent-transforming growth factor beta-binding protein 2                | 55.15               | 1.34                   |
| GSN         | P06396     | Gelsolin                                                                | 51.28               | 35.33                  |
| DYNC1H1     | Q14204     | Cytoplasmic dynein 1 heavy chain 1                                      | 38.79               | 24.07                  |
| ACTB        | P60709     | Actin, cytoplasmic 1                                                    | 40.53               | 199.77                 |
| ACTN1       | P12814     | Alpha-actinin-1                                                         | 38.62               | 22.95                  |
| TLN1        | Q9Y490     | Talin-1                                                                 | 38.98               | 16.51                  |
| LAMB1       | P07942     | Laminin subunit beta-1                                                  | 41.24               | 1                      |
| HRNR        | Q86YZ3     | Hornerin                                                                | 40.49               | 6.04                   |
| TGFBI       | Q15582     | Transforming growth factor-beta-induced protein ig-h3                   | 39.46               | 0.34                   |
| ACTN4       | O43707     | Alpha-actinin-4                                                         | 33.22               | 40.47                  |
| PCOLCE      | Q15113     | Procollagen C-endopeptidase enhancer 1                                  | 42.53               | 0                      |
| SDCBP       | O00560     | Syntenin-1                                                              | 34.83               | 194.57                 |
| MYO1C       | O00159     | Myosin-Ic                                                               | 31.36               | 100.42                 |
| C3          | P01024     | Complement C3                                                           | 31.51               | 60.21                  |
| PZP         | P20742     | Pregnancy zone protein                                                  | 38.39               | 5.28                   |
| MSN         | P26038     | Moesin                                                                  | 30.81               | 192.15                 |
| ACTC1       | P68032     | Actin, alpha cardiac muscle 1                                           | 30.31               | 101.39                 |
| LAMC1       | P11047     | Laminin subunit gamma-1                                                 | 34.16               | 4.18                   |
| TUBB        | P07437     | Tubulin beta chain                                                      | 29.97               | 32.3                   |
| VIM         | P08670     | Vimentin                                                                | 31.28               | 0                      |
| DPP4        | P27487     | Dipeptidyl peptidase 4                                                  | 27.4                | 293.23                 |

|          |        |                                                         |       |        |
|----------|--------|---------------------------------------------------------|-------|--------|
| HSPA8    | P11142 | Heat shock cognate 71 kDa protein                       | 30.03 | 92.71  |
| ACTA1    | P68133 | Actin, alpha skeletal muscle                            | 27.68 | 101.39 |
| STOM     | P27105 | Erythrocyte band 7 integral membrane protein            | 27.4  | 45.19  |
| C4B      | P0C0L5 | Complement C4-B                                         | 34.07 | 62.34  |
| ITGB1    | P05556 | Integrin beta-1                                         | 26.67 | 5.2    |
| C4A      | P0C0L4 | Complement C4-A                                         | 33.67 | 60.18  |
| ATP1A1   | P05023 | Sodium/potassium-transporting ATPase subunit alpha-1    | 27.1  | 57.36  |
| CCDC80   | Q76M96 | Coiled-coil domain-containing protein 80                | 31    | 0      |
| DSP      | P15924 | Desmoplakin                                             | 28.6  | 2.48   |
| LAMA5    | O15230 | Laminin subunit alpha-5                                 | 27.55 | 12.52  |
| LRP1     | Q07954 | Prolow-density lipoprotein receptor-related protein 1   | 27.94 | 0.69   |
| TUBA1B   | P68363 | Tubulin alpha-1B chain                                  | 25.23 | 57.21  |
| COL4A2   | P08572 | Collagen alpha-2(IV) chain                              | 29.39 | 3.03   |
| TUBB2C   | P68371 | Tubulin beta-2C chain                                   | 24.24 | 34.64  |
| NID2     | Q14112 | Nidogen-2                                               | 28.13 | 0.98   |
| TUBA1A   | Q71U36 | Tubulin alpha-1A chain                                  | 23.81 | 43.07  |
| THBS2    | P35442 | Thrombospondin-2                                        | 26.9  | 0.49   |
| VCP      | P55072 | Transitional endoplasmic reticulum ATPase               | 23.6  | 9.95   |
| TUBA1C   | Q9BQE3 | Tubulin alpha-1C chain                                  | 22.91 | 54.52  |
| EHD2     | Q9NZN4 | EH domain-containing protein 2                          | 21.85 | 1.15   |
| MMP2     | P08253 | 72 kDa type IV collagenase                              | 25.41 | 0.49   |
| TUBB3    | Q13509 | Tubulin beta-3 chain                                    | 22.15 | 21.24  |
| TUBA4A   | P68366 | Tubulin alpha-4A chain                                  | 21.83 | 49.08  |
| C1R      | P00736 | Complement C1r subcomponent                             | 25.75 | 2.14   |
| EEF1A1   | P68104 | Elongation factor 1-alpha 1                             | 21.1  | 39.6   |
| CTSD     | P07339 | Cathepsin D                                             | 23.14 | 23.77  |
| UBC      | P62988 | Ubiquitin                                               | 22.17 | 65.34  |
| HTRA1    | Q92743 | Serine protease HTRA1                                   | 24.72 | 4.23   |
| PGK1     | P00558 | Phosphoglycerate kinase 1                               | 21.21 | 58.9   |
| PXDN     | Q92626 | Peroxidasin homolog                                     | 22.65 | 0      |
| COL18A1  | P39060 | Collagen alpha-1(XVIII) chain                           | 24.92 | 19.53  |
| CD81     | P60033 | CD81 antigen                                            | 20.56 | 7.07   |
| PDCD6IP  | Q8WUM4 | Programmed cell death 6-interacting protein             | 20.83 | 257.48 |
| TUBB4    | P04350 | Tubulin beta-4 chain                                    | 19.53 | 22.93  |
| TUBB2A   | Q13885 | Tubulin beta-2A chain                                   | 20.04 | 27.81  |
| FLNC     | Q14315 | Filamin-C                                               | 19.76 | 0.98   |
| HSPA5    | P11021 | 78 kDa glucose-regulated protein                        | 20.29 | 18.82  |
| ATP2B4   | P23634 | Plasma membrane calcium-transporting ATPase 4           | 18.43 | 0      |
| GNAI2    | P04899 | Guanine nucleotide-binding protein G(i) subunit alpha-2 | 18.66 | 87.72  |
| KRT8     | P05787 | Keratin, type II cytoskeletal 8                         | 22.18 | 4.95   |
| ALDOA    | P04075 | Fructose-bisphosphate aldolase A                        | 18.18 | 15.37  |
| IQGAP1   | P46940 | Ras GTPase-activating-like protein IQGAP1               | 18.98 | 31.4   |
| VCL      | P18206 | Vinculin                                                | 19.4  | 6.53   |
| KRT3     | P12035 | Keratin, type II cytoskeletal 3                         | 20.18 | 5.85   |
| TNC      | P24821 | Tenascin                                                | 17.39 | 0.34   |
| AGRN     | O00468 | Agrin                                                   | 16.89 | 28.75  |
| HSP90AA1 | P07900 | Heat shock protein HSP 90-alpha                         | 16.63 | 30.04  |
| KRT79    | Q5XKE5 | Keratin, type II cytoskeletal 79                        | 18.9  | 10.08  |
| COL14A1  | Q05707 | Collagen alpha-1(XIV) chain                             | 21.78 | 0      |
| MFAP4    | P55083 | Microfibril-associated glycoprotein 4                   | 21.09 | 1.64   |
| CPXM2    | Q8N436 | Inactive carboxypeptidase-like protein X2               | 20.27 | 2.28   |
| COL6A1   | P12109 | Collagen alpha-1(VI) chain                              | 18.52 | 130.73 |
| KRT13    | P13646 | Keratin, type I cytoskeletal 13                         | 15.88 | 46.76  |
| ATP5B    | P06576 | ATP synthase subunit beta, mitochondrial                | 15.58 | 10.06  |
| C1S      | P09871 | Complement C1s subcomponent                             | 18.62 | 0.34   |
| TUBA8    | Q9NY65 | Tubulin alpha-8 chain                                   | 15.66 | 37.63  |

|          |        |                                                           |       |       |
|----------|--------|-----------------------------------------------------------|-------|-------|
| PRKDC    | P78527 | DNA-dependent protein kinase catalytic subunit            | 17.88 | 0.33  |
| HSPA1B   | P08107 | Heat shock 70 kDa protein 1A/1B                           | 16.23 | 68.44 |
| HMCN1    | Q96RW7 | Hemicentin-1                                              | 17.79 | 10.12 |
| COL3A1   | P02461 | Collagen alpha-1(III) chain                               | 17.3  | 0     |
| CLU      | P10909 | Clusterin                                                 | 16.84 | 19.78 |
| GPC4     | O75487 | Glypican-4                                                | 14.68 | 12.38 |
| CNTN1    | Q12860 | Contactin-1                                               | 15.76 | 1     |
| IGFBP2   | P18065 | Insulin-like growth factor-binding protein 2              | 16.77 | 0     |
| ENO2     | P09104 | Gamma-enolase                                             | 13.58 | 61.47 |
| EHD1     | Q9H4M9 | EH domain-containing protein 1                            | 12.94 | 56.24 |
| LDHB     | P07195 | L-lactate dehydrogenase B chain                           | 13.69 | 76.14 |
| EEF2     | P13639 | Elongation factor 2                                       | 13.32 | 24.34 |
| P4HB     | P07237 | Protein disulfide-isomerase                               | 13.74 | 3.79  |
| POTEE    | Q6S8J3 | POTE ankyrin domain family member E                       | 13.18 | 91.44 |
| GNA11    | P29992 | Guanine nucleotide-binding protein subunit alpha-11       | 12.22 | 46.58 |
| QSOX1    | O00391 | Sulfhydryl oxidase 1                                      | 15.64 | 20.46 |
| ATP1A3   | P13637 | Sodium/potassium-transporting ATPase subunit alpha-3      | 13.29 | 34.33 |
| CFH      | P08603 | Complement factor H                                       | 16.11 | 2.03  |
| ANGPTL7  | O43827 | Angiopoietin-related protein 7                            | 17.54 | 0     |
| RAP1B    | P61224 | Ras-related protein Rap-1b                                | 13.38 | 11.88 |
| KRT7     | P08729 | Keratin, type II cytoskeletal 7                           | 14.76 | 2.78  |
| LDHA     | P00338 | L-lactate dehydrogenase A chain                           | 12.52 | 18.55 |
| NUCB1    | Q02818 | Nucleobindin-1                                            | 15.84 | 3.41  |
| YWHAE    | P62258 | 14-3-3 protein epsilon                                    | 11.65 | 23.73 |
| RAP1A    | P62834 | Ras-related protein Rap-1A                                | 12.58 | 11.89 |
| GDI2     | P50395 | Rab GDP dissociation inhibitor beta                       | 11.29 | 57.37 |
| CACNA2D1 | P54289 | Voltage-dependent calcium channel subunit alpha-2/delta-1 | 11.43 | 6.95  |
| NID1     | P14543 | Nidogen-1                                                 | 14.53 | 12.86 |
| PLOD1    | Q02809 | Procollagen-lysine,2-oxoglutarate 5-dioxygenase 1         | 13    | 4.93  |
| SERPINE2 | P07093 | Glia-derived nexin                                        | 13.1  | 0     |
| DCD      | P81605 | Dermcidin                                                 | 12.9  | 0.83  |
| ENO3     | P13929 | Beta-enolase                                              | 11.75 | 62.47 |
| KRT80    | Q6KB66 | Keratin, type II cytoskeletal 80                          | 13.46 | 2.29  |
| ANXA4    | P09525 | Annexin A4                                                | 11.49 | 46.39 |
| ANXA11   | P50995 | Annexin A11                                               | 12.14 | 66.01 |
| PLEC     | Q15149 | Plectin-1                                                 | 11.91 | 1.31  |
| SLC44A2  | Q8IWA5 | Choline transporter-like protein 2                        | 11.44 | 48.92 |
| YWHAZ    | P63104 | 14-3-3 protein zeta/delta                                 | 11.02 | 24.75 |
| PGD      | P52209 | 6-phosphogluconate dehydrogenase, decarboxylating         | 11.26 | 17.5  |
| HSP90B1  | P14625 | Endoplasmic                                               | 12.1  | 8.47  |
| MCAM     | P43121 | Cell surface glycoprotein MUC18                           | 10.8  | 0.34  |
| CYB5R3   | P00387 | NADH-cytochrome b5 reductase 3                            | 11.08 | 2.18  |
| JUP      | P14923 | Junction plakoglobin                                      | 11.95 | 9.55  |
| RRAS     | P10301 | Ras-related protein R-Ras                                 | 11.02 | 3.85  |
| FLG2     | Q5D862 | Filaggrin-2                                               | 12.69 | 0.34  |
| SFRP1    | Q8N474 | Secreted frizzled-related protein 1                       | 13.11 | 2.04  |
| CAV1     | Q03135 | Caveolin-1                                                | 11.35 | 0     |
| MYH10    | P35580 | Myosin-10                                                 | 11.14 | 9.17  |
| GPI      | P06744 | Glucose-6-phosphate isomerase                             | 11.09 | 36.2  |
| HSPD1    | P10809 | 60 kDa heat shock protein, mitochondrial                  | 11.19 | 3.46  |
| ANGPTL2  | Q9UKU9 | Angiopoietin-related protein 2                            | 13.21 | 10.52 |
| OLFML3   | Q9NRN5 | Olfactomedin-like protein 3                               | 14.19 | 0     |
| PLTP     | P55058 | Phospholipid transfer protein                             | 13.68 | 0     |
| IGFBP7   | Q16270 | Insulin-like growth factor-binding protein 7              | 13.08 | 1.5   |
| RTN4     | Q9NQC3 | Reticulon-4                                               | 10.67 | 4.69  |
| MGP      | P08493 | Matrix Gla protein                                        | 14.14 | 0     |

|          |        |                                                                                    |       |        |
|----------|--------|------------------------------------------------------------------------------------|-------|--------|
| FLOT1    | O75955 | Flotillin-1                                                                        | 11.15 | 14.86  |
| HSP90AB1 | P08238 | Heat shock protein HSP 90-beta                                                     | 11.05 | 16.9   |
| LOXL2    | Q9Y4K0 | Lysyl oxidase homolog 2                                                            | 11.89 | 0      |
| SOD2     | P04179 | Superoxide dismutase [Mn], mitochondrial                                           | 10.27 | 0      |
| GNAQ     | P50148 | Guanine nucleotide-binding protein G(q) subunit alpha                              | 9.63  | 42.98  |
| TXNRD1   | Q16881 | Thioredoxin reductase 1, cytoplasmic                                               | 9.68  | 6.75   |
| CSPG4    | Q6UVK1 | Chondroitin sulfate proteoglycan 4                                                 | 9.96  | 5.46   |
| GNB1     | P62873 | Guanine nucleotide-binding protein G(I)/G(S)/G(T) subunit beta-1                   | 10.05 | 74.02  |
| ITGA3    | P26006 | Integrin alpha-3                                                                   | 9.72  | 2.34   |
| HLA-A    | P30453 | HLA class I histocompatibility antigen, A-34 alpha chain                           | 10.28 | 4.03   |
| ITGA2    | P17301 | Integrin alpha-2                                                                   | 10.75 | 0.67   |
| NRP1     | O14786 | Neuropilin-1                                                                       | 10.19 | 0.33   |
| DSG1     | Q02413 | Desmoglein-1                                                                       | 11.71 | 0.83   |
| CANX     | P27824 | Calnexin                                                                           | 10.29 | 3.44   |
| C4orf31  | Q8TB73 | Fibronectin type-III domain-containing protein C4orf31                             | 12.87 | 0      |
| AHNAK    | Q09666 | Neuroblast differentiation-associated protein AHNAK                                | 10.3  | 8.45   |
| PGAM1    | P18669 | Phosphoglycerate mutase 1                                                          | 9.6   | 13.72  |
| ESYT1    | Q9BSJ8 | Extended synaptotagmin-1                                                           | 9.61  | 1.15   |
| TUBB6    | Q9BUF5 | Tubulin beta-6 chain                                                               | 9.84  | 11.05  |
| ATP2B1   | P20020 | Plasma membrane calcium-transporting ATPase 1                                      | 9.42  | 0      |
| COL1A1   | P02452 | Collagen alpha-1(I) chain                                                          | 12.43 | 0      |
| PSAP     | P07602 | Proactivator polypeptide                                                           | 11.82 | 0      |
| ACTN2    | P35609 | Alpha-actinin-2                                                                    | 9.29  | 7.43   |
| SVEP1    | Q4LDE5 | Sushi, von Willebrand factor type A, EGF and pentraxin domain-containing protein 1 | 12.25 | 1.33   |
| HLA-A    | P10314 | HLA class I histocompatibility antigen, A-32 alpha chain                           | 9.52  | 4.03   |
| ACTBL2   | Q562R1 | Beta-actin-like protein 2                                                          | 9.76  | 42.24  |
| HLA-A    | P16189 | HLA class I histocompatibility antigen, A-31 alpha chain                           | 9.52  | 4.03   |
| CD9      | P21926 | CD9 antigen                                                                        | 10.08 | 35.93  |
| PENK     | P01210 | Proenkephalin-A                                                                    | 12.39 | 0      |
| RDX      | P35241 | Radixin                                                                            | 9.12  | 136.17 |
| TKT      | P29401 | Transketolase                                                                      | 8.98  | 8.16   |
| PDIA3    | P30101 | Protein disulfide-isomerase A3                                                     | 8.84  | 2.46   |
| TUBB8    | Q3ZCM7 | Tubulin beta-8 chain                                                               | 9.12  | 10.25  |
| RAB7A    | P51149 | Ras-related protein Rab-7a                                                         | 9.54  | 6.61   |
| CD44     | P16070 | CD44 antigen                                                                       | 9.96  | 0.68   |
| HSPA2    | P54652 | Heat shock-related 70 kDa protein 2                                                | 9.04  | 40.12  |
| PYGB     | P11216 | Glycogen phosphorylase, brain form                                                 | 8.35  | 11.1   |
| GNAI3    | P08754 | Guanine nucleotide-binding protein G(k) subunit alpha                              | 8.25  | 89.69  |
| SERPINF1 | P36955 | Pigment epithelium-derived factor                                                  | 11.77 | 18.33  |
| TPI1     | P60174 | Triosephosphate isomerase                                                          | 8.67  | 23.53  |
| HLA-A    | P30512 | HLA class I histocompatibility antigen, A-29 alpha chain                           | 8.81  | 5.18   |
| YWHAG    | P61981 | 14-3-3 protein gamma                                                               | 8.21  | 10.68  |
| HLA-A    | P16188 | HLA class I histocompatibility antigen, A-30 alpha chain                           | 8.99  | 4.17   |
| GANAB    | Q14697 | Neutral alpha-glucosidase AB                                                       | 8.32  | 18.7   |
| GNAS     | Q5JWF2 | Guanine nucleotide-binding protein G(s) subunit alpha isoforms XLas                | 8.04  | 39.83  |
| HLA-A    | P30456 | HLA class I histocompatibility antigen, A-43 alpha chain                           | 8.41  | 4.85   |
| LAMB2    | P55268 | Laminin subunit beta-2                                                             | 8.82  | 0.67   |
| HLA-A    | P04439 | HLA class I histocompatibility antigen, A-3 alpha chain                            | 8.59  | 5.18   |
| PAM      | P19021 | Peptidyl-glycine alpha-amidating monooxygenase                                     | 10.63 | 2.32   |
| HLA-A    | P10316 | HLA class I histocompatibility antigen, A-69 alpha chain                           | 8.69  | 4.36   |
| TFRC     | P02786 | Transferrin receptor protein 1                                                     | 8.59  | 0      |
| EFEMP2   | O95967 | EGF-containing fibulin-like extracellular matrix protein 2                         | 9.94  | 1.68   |

|          |        |                                                                      |      |        |
|----------|--------|----------------------------------------------------------------------|------|--------|
| KRT78    | Q8N1N4 | Keratin, type II cytoskeletal 78                                     | 9.42 | 1.81   |
| LAMP1    | P11279 | Lysosome-associated membrane glycoprotein 1                          | 8.41 | 7.78   |
| EZR      | P15311 | Ezrin                                                                | 8.05 | 238.23 |
| FASN     | P49327 | Fatty acid synthase                                                  | 7.69 | 30.16  |
| WDR1     | O75083 | WD repeat-containing protein 1                                       | 7.54 | 19.01  |
| NAMPT    | P43490 | Nicotinamide phosphoribosyltransferase                               | 7.78 | 1.82   |
| ABCC1    | P33527 | Multidrug resistance-associated protein 1                            | 7.4  | 0      |
| KRT81    | Q14533 | Keratin, type II cuticular Hb1                                       | 8.75 | 0      |
| PCYOX1   | Q9UHG3 | Prenylcysteine oxidase 1                                             | 8.01 | 1.64   |
| AOC3     | Q16853 | Membrane primary amine oxidase                                       | 8.14 | 1.02   |
| GSTM3    | P21266 | Glutathione S-transferase Mu 3                                       | 7.54 | 25.56  |
| PLSCR3   | Q9NRY6 | Phospholipid scramblase 3                                            | 8.79 | 2.33   |
| GNAS     | P63092 | Guanine nucleotide-binding protein G(s) subunit alpha isoforms short | 7.23 | 40.17  |
| GNB2     | P62879 | Guanine nucleotide-binding protein G(I)/G(S)/G(T) subunit beta-2     | 7.23 | 72.85  |
| EFEMP1   | Q12805 | EGF-containing fibulin-like extracellular matrix protein 1           | 8.8  | 17.35  |
| ARHGAP1  | Q07960 | Rho GTPase-activating protein 1                                      | 7.28 | 8.92   |
| VAT1     | Q99536 | Synaptic vesicle membrane protein VAT-1 homolog                      | 8.02 | 5.39   |
| CFL1     | P23528 | Cofilin-1                                                            | 7.14 | 10.12  |
| HLA-C    | P30508 | HLA class I histocompatibility antigen, Cw-12 alpha chain            | 7.88 | 4.81   |
| BASP1    | P80723 | Brain acid soluble protein 1                                         | 7.32 | 5.88   |
| CTSB     | P07858 | Cathepsin B                                                          | 7.74 | 0.67   |
| POTEF    | A5A3E0 | POTE ankyrin domain family member F                                  | 7.33 | 27.49  |
| PFN1     | P07737 | Profilin-1                                                           | 7.7  | 1.8    |
| TAGLN    | Q01995 | Transgelin                                                           | 8.21 | 0      |
| GC       | P02774 | Vitamin D-binding protein                                            | 7.88 | 4.04   |
| ITIH2    | P19823 | Inter-alpha-trypsin inhibitor heavy chain H2                         | 8.3  | 0.83   |
| PRELP    | P51888 | Prolargin                                                            | 9.09 | 0      |
| CD63     | P08962 | CD63 antigen                                                         | 7.56 | 5.19   |
| GNAI1    | P63096 | Guanine nucleotide-binding protein G(i) subunit alpha-1              | 6.64 | 98.06  |
| SPTAN1   | Q13813 | Spectrin alpha chain, brain                                          | 6.92 | 4.99   |
| HADHA    | P40939 | Trifunctional enzyme subunit alpha, mitochondrial                    | 7.21 | 4.57   |
| GDI1     | P31150 | Rab GDP dissociation inhibitor alpha                                 | 6.69 | 34.48  |
| FLOT2    | Q14254 | Flotillin-2                                                          | 7.3  | 14.13  |
| CTNNA1   | P35221 | Catenin alpha-1                                                      | 6.73 | 2.16   |
| ATP2A2   | P16615 | Sarcoplasmic/endoplasmic reticulum calcium ATPase 2                  | 6.88 | 0.33   |
| MAP1B    | P46821 | Microtubule-associated protein 1B                                    | 7.25 | 0      |
| ATL3     | Q6DD88 | Atlastin-3                                                           | 6.88 | 0      |
| CAP1     | Q01518 | Adenylyl cyclase-associated protein 1                                | 6.83 | 5.47   |
| PTRF     | Q6NZI2 | Polymerase I and transcript release factor                           | 7.94 | 0      |
| HIST2H4A | P62805 | Histone H4                                                           | 8.64 | 2.78   |
| TUBB1    | Q9H4B7 | Tubulin beta-1 chain                                                 | 7.11 | 7.21   |
| CROCC    | Q5TZA2 | Rootletin                                                            | 7.26 | 1      |
| MAN2A1   | Q16706 | Alpha-mannosidase 2                                                  | 8.88 | 23.08  |
| CAPN2    | P17655 | Calpain-2 catalytic subunit                                          | 6.24 | 19.63  |
| YWHAB    | P31946 | 14-3-3 protein beta/alpha                                            | 6.29 | 18.79  |
| BGN      | P21810 | Biglycan                                                             | 8.56 | 13.37  |
| PTGFRN   | Q9P2B2 | Prostaglandin F2 receptor negative regulator                         | 6.8  | 1.02   |
| ABI3BP   | Q7Z7G0 | Target of Nesh-SH3                                                   | 9.07 | 0.67   |
| ITGA7    | Q13683 | Integrin alpha-7                                                     | 6.24 | 0      |
| KRT31    | Q15323 | Keratin, type I cuticular Ha1                                        | 7.22 | 0.82   |
| ALCAM    | Q13740 | CD166 antigen                                                        | 7.17 | 0      |
| TIMP2    | P16035 | Metalloproteinase inhibitor 2                                        | 8.46 | 0      |
| PIIB     | P23284 | Peptidyl-prolyl cis-trans isomerase B                                | 7.13 | 2.83   |
| CA12     | O43570 | Carbonic anhydrase 12                                                | 6.66 | 7.94   |

|          |        |                                                                          |      |        |
|----------|--------|--------------------------------------------------------------------------|------|--------|
| HLA-A    | P05534 | HLA class I histocompatibility antigen, A-24 alpha chain                 | 7.17 | 4.84   |
| HLA-B    | P30493 | HLA class I histocompatibility antigen, B-55 alpha chain                 | 6.8  | 3.68   |
| ATP6V0A1 | Q93050 | V-type proton ATPase 116 kDa subunit a isoform 1                         | 5.98 | 12.5   |
| PLXNB2   | O15031 | Plexin-B2                                                                | 6.26 | 5.71   |
| SLC3A2   | P08195 | 4F2 cell-surface antigen heavy chain                                     | 6.21 | 17.24  |
| YWHAQ    | P27348 | 14-3-3 protein theta                                                     | 5.98 | 12.14  |
| PSMD2    | Q13200 | 26S proteasome non-ATPase regulatory subunit 2                           | 6.35 | 4.86   |
| FAM129A  | Q9BZQ8 | Protein Niban                                                            | 6.02 | 2.68   |
| RPN1     | P04843 | Dolichyl-diphosphooligosaccharide--protein glycosyltransferase subunit 1 | 6.35 | 2.01   |
| HSPA6    | P17066 | Heat shock 70 kDa protein 6                                              | 7.04 | 18.81  |
| HLA-C    | Q29963 | HLA class I histocompatibility antigen, Cw-6 alpha chain                 | 6.58 | 2.83   |
| FAP      | Q12884 | Seprase                                                                  | 6.21 | 0      |
| NCAM1    | P13591 | Neural cell adhesion molecule 1                                          | 6.63 | 0      |
| MDH2     | P40926 | Malate dehydrogenase, mitochondrial                                      | 6.26 | 2      |
| ICAM1    | P05362 | Intercellular adhesion molecule 1                                        | 5.98 | 0      |
| HLA-C    | P30504 | HLA class I histocompatibility antigen, Cw-4 alpha chain                 | 6.39 | 3.15   |
| FTH1     | P02794 | Ferritin heavy chain                                                     | 6.63 | 2.16   |
| CXCL6    | P80162 | C-X-C motif chemokine 6                                                  | 5.88 | 0      |
| UBA1     | P22314 | Ubiquitin-like modifier-activating enzyme 1                              | 6    | 24.5   |
| SERPING1 | P05155 | Plasma protease C1 inhibitor                                             | 7.52 | 95.03  |
| CYFIP1   | Q7L576 | Cytoplasmic FMR1-interacting protein 1                                   | 5.62 | 16.37  |
| FLNB     | O75369 | Filamin-B                                                                | 6.09 | 9.36   |
| ANXA7    | P20073 | Annexin A7                                                               | 6.32 | 24.17  |
| GLUD1    | P00367 | Glutamate dehydrogenase 1, mitochondrial                                 | 6.19 | 2.41   |
| HSPA1L   | P34931 | Heat shock 70 kDa protein 1-like                                         | 6.09 | 33.08  |
| ATP5A1   | P25705 | ATP synthase subunit alpha, mitochondrial                                | 6    | 4.32   |
| ARF3     | P61204 | ADP-ribosylation factor 3                                                | 6.51 | 12.25  |
| AP2B1    | P63010 | AP-2 complex subunit beta                                                | 5.81 | 7.35   |
| KPNB1    | Q14974 | Importin subunit beta-1                                                  | 5.86 | 3.63   |
| CALR     | P27797 | Calreticulin                                                             | 5.95 | 0.49   |
| HLA-C    | P10321 | HLA class I histocompatibility antigen, Cw-7 alpha chain                 | 6.18 | 2.34   |
| HLA-B    | P30460 | HLA class I histocompatibility antigen, B-8 alpha chain                  | 5.67 | 2.34   |
| HLA-C    | Q95604 | HLA class I histocompatibility antigen, Cw-17 alpha chain                | 6.18 | 3.51   |
| HLA-B    | P30491 | HLA class I histocompatibility antigen, B-53 alpha chain                 | 6.04 | 4.17   |
| HEXA     | P06865 | Beta-hexosaminidase subunit alpha                                        | 6.78 | 1.68   |
| SLC2A1   | P11166 | Solute carrier family 2, facilitated glucose transporter member 1        | 5.81 | 0      |
| TINAGL1  | Q9GZM7 | Tubulointerstitial nephritis antigen-like                                | 6.5  | 1.65   |
| ATP4A    | P20648 | Potassium-transporting ATPase alpha chain 1                              | 5.9  | 4.74   |
| ATP2B3   | Q16720 | Plasma membrane calcium-transporting ATPase 3                            | 5.71 | 0.33   |
| AHSG     | P02765 | Alpha-2-HS-glycoprotein                                                  | 7.15 | 0.67   |
| ANPEP    | P15144 | Aminopeptidase N                                                         | 5.92 | 610.61 |
| ATP6V1A  | P38606 | V-type proton ATPase catalytic subunit A                                 | 5.68 | 162.98 |
| NAGLU    | P54802 | Alpha-N-acetylglucosaminidase                                            | 5.96 | 47.58  |
| NPEPPS   | P55786 | Puromycin-sensitive aminopeptidase                                       | 5.13 | 14.46  |
| CNP      | P09543 | 2',3'-cyclic-nucleotide 3'-phosphodiesterase                             | 5.36 | 45     |
| F2       | P00734 | Prothrombin                                                              | 6.01 | 4.31   |
| CAND1    | Q86VP6 | Cullin-associated NEDD8-dissociated protein 1                            | 5.27 | 8.09   |
| ACLY     | P53396 | ATP-citrate synthase                                                     | 5.36 | 6.19   |
| HSPA9    | P38646 | Stress-70 protein, mitochondrial                                         | 5.73 | 2.29   |
| ITGAV    | P06756 | Integrin alpha-V                                                         | 5.22 | 2.52   |
| ITM2B    | Q9Y287 | Integral membrane protein 2B                                             | 5.59 | 19.35  |
| PARP4    | Q9UKK3 | Poly [ADP-ribose] polymerase 4                                           | 5.68 | 0      |
| CTNNB1   | P35222 | Catenin beta-1                                                           | 5.08 | 1.51   |

|           |        |                                                                |      |       |
|-----------|--------|----------------------------------------------------------------|------|-------|
| HLA-B     | P01889 | HLA class I histocompatibility antigen, B-7 alpha chain        | 5.26 | 2.34  |
| RAB1B     | Q9H0U4 | Ras-related protein Rab-1B                                     | 5.45 | 4.29  |
| HLA-B     | P18463 | HLA class I histocompatibility antigen, B-37 alpha chain       | 5.5  | 2.19  |
| HLA-B     | P30492 | HLA class I histocompatibility antigen, B-54 alpha chain       | 5.68 | 4.03  |
| CST3      | P01034 | Cystatin-C                                                     | 6.7  | 1.51  |
| ATP6V1B2  | P21281 | V-type proton ATPase subunit B, brain isoform                  | 5    | 62.19 |
| AKR1B1    | P15121 | Aldose reductase                                               | 4.68 | 19.09 |
| TPP1      | O14773 | Tripeptidyl-peptidase 1                                        | 6.3  | 63.01 |
| RHOA      | P61586 | Transforming protein RhoA                                      | 5    | 16.44 |
| SCARB2    | Q14108 | Lysosome membrane protein 2                                    | 5.61 | 11.52 |
| PPIA      | P62937 | Peptidyl-prolyl cis-trans isomerase A                          | 5.19 | 7.43  |
| PRDX1     | Q06830 | Peroxiredoxin-1                                                | 5.19 | 4.67  |
| HLA-C     | Q29865 | HLA class I histocompatibility antigen, Cw-18 alpha chain      | 5.09 | 2     |
| RFTN1     | Q14699 | Raftlin                                                        | 4.86 | 2.19  |
| SQRDL     | Q9Y6N5 | Sulfide:quinone oxidoreductase, mitochondrial                  | 5.24 | 0     |
| DNAJC3    | Q13217 | DnaJ homolog subfamily C member 3                              | 6.85 | 0.49  |
| KRT19     | P08727 | Keratin, type I cytoskeletal 19                                | 6.34 | 7.22  |
| KRT33B    | Q14525 | Keratin, type I cuticular Ha3-II                               | 5.52 | 0.33  |
| HLA-H     | P01893 | Putative HLA class I histocompatibility antigen, alpha chain H | 5.46 | 2.33  |
| NRP2      | O60462 | Neuropilin-2                                                   | 4.86 | 0     |
| NME1-NME2 | P22392 | Nucleoside diphosphate kinase B                                | 5.19 | 3.99  |
| ALDOC     | P09972 | Fructose-bisphosphate aldolase C                               | 5.14 | 5.49  |
| LGALS1    | P09382 | Galectin-1                                                     | 5.51 | 0.98  |
| APOB      | P04114 | Apolipoprotein B-100                                           | 5.74 | 0     |
| TIMP1     | P01033 | Metalloproteinase inhibitor 1                                  | 6.21 | 0     |
| B2M       | P61769 | Beta-2-microglobulin                                           | 5.79 | 0.34  |
| EHD3      | Q9NZN3 | EH domain-containing protein 3                                 | 4.6  | 28.06 |
| FAM129B   | Q96TA1 | Niban-like protein 1                                           | 4.46 | 15.79 |
| SERPINA3  | P01011 | Alpha-1-antichymotrypsin                                       | 6.31 | 38.14 |
| GLB1      | P16278 | Beta-galactosidase                                             | 5.11 | 37.74 |
| AKR1C1    | Q04828 | Aldo-keto reductase family 1 member C1                         | 4.37 | 9.78  |
| DPP7      | Q9UHL4 | Dipeptidyl peptidase 2                                         | 5.66 | 14.51 |
| RAB14     | P61106 | Ras-related protein Rab-14                                     | 4.93 | 8.2   |
| GNA14     | O95837 | Guanine nucleotide-binding protein subunit alpha-14            | 4.55 | 21.9  |
| VTN       | P04004 | Vitronectin                                                    | 5.2  | 14.06 |
| LMNA      | P02545 | Lamin-A/C                                                      | 5.39 | 0.49  |
| FLG       | P20930 | Filaggrin                                                      | 4.46 | 0.34  |
| PFKP      | Q01813 | 6-phosphofructokinase type C                                   | 4.46 | 0.34  |
| GARS      | P41250 | Glycyl-tRNA synthetase                                         | 4.55 | 5.27  |
| ARF4      | P18085 | ADP-ribosylation factor 4                                      | 5.16 | 5.79  |
| KRT85     | P78386 | Keratin, type II cuticular Hb5                                 | 5.39 | 0     |
| HLA-B     | Q31612 | HLA class I histocompatibility antigen, B-73 alpha chain       | 4.92 | 1.66  |
| OGN       | P20774 | Mimecan                                                        | 6.36 | 0     |
| ATP1B3    | P54709 | Sodium/potassium-transporting ATPase subunit beta-3            | 4.55 | 0.68  |
| CD82      | P27701 | CD82 antigen                                                   | 4.6  | 2.37  |
| NPC1      | O15118 | Niemann-Pick C1 protein                                        | 5.11 | 0.69  |
| NME1      | P15531 | Nucleoside diphosphate kinase A                                | 4.74 | 0.69  |
| LAMP2     | P13473 | Lysosome-associated membrane glycoprotein 2                    | 4.93 | 6.06  |
| KIAA1109  | Q2LD37 | Uncharacterized protein KIAA1109                               | 5.25 | 1     |
| AFP       | P02771 | Alpha-fetoprotein                                              | 5.8  | 0     |
| GNA13     | Q14344 | Guanine nucleotide-binding protein subunit alpha-13            | 4.2  | 26.06 |
| KIF5B     | P33176 | Kinesin-1 heavy chain                                          | 4.15 | 11.32 |
| CPNE3     | O75131 | Copine-3                                                       | 4.38 | 22.44 |
| SERPINC1  | P01008 | Antithrombin-III                                               | 4.94 | 7.15  |

|           |        |                                                                          |      |        |
|-----------|--------|--------------------------------------------------------------------------|------|--------|
| PPP1CB    | P62140 | Serine/threonine-protein phosphatase PP1-beta catalytic subunit          | 4.34 | 7.8    |
| FERMT2    | Q96AC1 | Fermitin family homolog 2                                                | 4.29 | 1.83   |
| STXBP3    | O00186 | Syntaxin-binding protein 3                                               | 4.01 | 0.34   |
| HLA-B     | Q04826 | HLA class I histocompatibility antigen, B-40 alpha chain                 | 4.38 | 3.02   |
| FTL       | P02792 | Ferritin light chain                                                     | 4.57 | 6.36   |
| HLA-C     | P30501 | HLA class I histocompatibility antigen, Cw-2 alpha chain                 | 4.57 | 2.64   |
| KRT73     | Q86Y46 | Keratin, type II cytoskeletal 73                                         | 4.61 | 8.82   |
| ENDOD1    | O94919 | Endonuclease domain-containing 1 protein                                 | 4.34 | 0      |
| HLA-B     | P30479 | HLA class I histocompatibility antigen, B-41 alpha chain                 | 4.24 | 2.68   |
| KRT77     | Q7Z794 | Keratin, type II cytoskeletal 1b                                         | 4.52 | 0      |
| G6PD      | P11413 | Glucose-6-phosphate 1-dehydrogenase                                      | 4.25 | 2.16   |
| FBN1      | P35555 | Fibrillin-1                                                              | 5.4  | 0      |
| SRPX      | P78539 | Sushi repeat-containing protein SRPX                                     | 5.22 | 0      |
| RPN2      | P04844 | Dolichyl-diphosphooligosaccharide--protein glycosyltransferase subunit 2 | 4.34 | 0.49   |
| DDR2      | Q16832 | Discoidin domain-containing receptor 2                                   | 4.15 | 0.49   |
| HSD17B4   | P51659 | Peroxisomal multifunctional enzyme type 2                                | 4.34 | 0.82   |
| AHCYL1    | O43865 | Putative adenosylhomocysteinase 2                                        | 5.08 | 2.84   |
| HIST1H2BK | O60814 | Histone H2B type 1-K                                                     | 5.36 | 0.67   |
| ACTR1A    | P61163 | Alpha-centractin                                                         | 4.24 | 1.64   |
| DST       | Q03001 | Bullous pemphigoid antigen 1                                             | 4.34 | 0.67   |
| CXCL2     | P19875 | C-X-C motif chemokine 2                                                  | 5.21 | 0      |
| EHD4      | Q9H223 | EH domain-containing protein 4                                           | 3.89 | 31.98  |
| ATP12A    | P54707 | Potassium-transporting ATPase alpha chain 2                              | 4.03 | 18.96  |
| SERPINF2  | P08697 | Alpha-2-antiplasmin                                                      | 4.4  | 9.57   |
| AKR1C2    | P52895 | Aldo-keto reductase family 1 member C2                                   | 3.7  | 6.74   |
| CFB       | P00751 | Complement factor B                                                      | 3.93 | 5.8    |
| RAB5C     | P51148 | Ras-related protein Rab-5C                                               | 3.93 | 12.79  |
| PRCP      | P42785 | Lysosomal Pro-X carboxypeptidase                                         | 4.3  | 17.47  |
| TGM3      | Q08188 | Protein-glutamine gamma-glutamyltransferase E                            | 4.21 | 1.31   |
| CKAP4     | Q07065 | Cytoskeleton-associated protein 4                                        | 3.98 | 0      |
| ATP6AP2   | O75787 | Renin receptor                                                           | 5.14 | 12.33  |
| CCT4      | P50991 | T-complex protein 1 subunit delta                                        | 3.84 | 4.29   |
| SERPINH1  | P50454 | Serpin H1                                                                | 4.26 | 2.8    |
| TCP1      | P17987 | T-complex protein 1 subunit alpha                                        | 3.84 | 0.69   |
| HYOU1     | Q9Y4L1 | Hypoxia up-regulated protein 1                                           | 4.21 | 1.16   |
| ITGA4     | P13612 | Integrin alpha-4                                                         | 3.65 | 0      |
| HLA-B     | P03989 | HLA class I histocompatibility antigen, B-27 alpha chain                 | 4.03 | 2.53   |
| BSG       | P35613 | Basigin                                                                  | 3.7  | 1.15   |
| SLC12A4   | Q9UP95 | Solute carrier family 12 member 4                                        | 3.8  | 0.33   |
| RAB1A     | P62820 | Ras-related protein Rab-1A                                               | 3.84 | 3.28   |
| EPB41L2   | O43491 | Band 4.1-like protein 2                                                  | 3.61 | 1.31   |
| RAC1      | P63000 | Ras-related C3 botulinum toxin substrate 1                               | 3.98 | 4.86   |
| LOXL1     | Q08397 | Lysyl oxidase homolog 1                                                  | 5.41 | 0      |
| RAB10     | P61026 | Ras-related protein Rab-10                                               | 4.07 | 11.99  |
| CTSA      | P10619 | Lysosomal protective protein                                             | 4.95 | 2.64   |
| PDCD6     | O75340 | Programmed cell death protein 6                                          | 4.03 | 6.14   |
| AHCYL2    | Q96HN2 | Putative adenosylhomocysteinase 3                                        | 4.72 | 3.18   |
| ANGPTL1   | O95841 | Angiopoietin-related protein 1                                           | 4.3  | 7.52   |
| MYH14     | Q7Z406 | Myosin-14                                                                | 4.4  | 1.83   |
| THBS3     | P49746 | Thrombospondin-3                                                         | 4.4  | 0      |
| PPAP2B    | O14495 | Lipid phosphate phosphohydrolase 3                                       | 4.03 | 0      |
| C1orf58   | Q5VW32 | BRO1 domain-containing protein BROX                                      | 3.67 | 125.06 |
| GAA       | P10253 | Lysosomal alpha-glucosidase                                              | 3.72 | 27.98  |
| CBR1      | P16152 | Carbonyl reductase [NADPH] 1                                             | 3.35 | 21.82  |



|           |        |                                                                  |      |       |
|-----------|--------|------------------------------------------------------------------|------|-------|
| CCT2      | P78371 | T-complex protein 1 subunit beta                                 | 3.39 | 3.64  |
| CLIC4     | Q9Y696 | Chloride intracellular channel protein 4                         | 3.58 | 7.91  |
| AP1B1     | Q10567 | AP-1 complex subunit beta-1                                      | 3.48 | 5.47  |
| DNAJC13   | O75165 | DnaJ homolog subfamily C member 13                               | 3.39 | 0.98  |
| COPA      | P53621 | Coatomer subunit alpha                                           | 3.53 | 1.5   |
| CPE       | P16870 | Carboxypeptidase E                                               | 4.32 | 3.21  |
| ARHGDIA   | P52565 | Rho GDP-dissociation inhibitor 1                                 | 3.35 | 3.46  |
| DSTN      | P60981 | Destrin                                                          | 3.53 | 2.18  |
| VDAC2     | P45880 | Voltage-dependent anion-selective channel protein 2              | 3.58 | 1.5   |
| PROS1     | P07225 | Vitamin K-dependent protein S                                    | 4.69 | 0.33  |
| HBA2      | P69905 | Hemoglobin subunit alpha                                         | 4.13 | 2.83  |
| EPHX1     | P07099 | Epoxide hydrolase 1                                              | 3.58 | 0.34  |
| SLC1A5    | Q15758 | Neutral amino acid transporter B(0)                              | 3.58 | 2.81  |
| KRT74     | Q7RTS7 | Keratin, type II cytoskeletal 74                                 | 3.85 | 3.64  |
| KIAA1199  | Q8WUJ3 | Protein KIAA1199                                                 | 4.23 | 0     |
| GNB4      | Q9HAV0 | Guanine nucleotide-binding protein subunit beta-4                | 3.58 | 14.76 |
| TLN2      | Q9Y4G6 | Talin-2                                                          | 3.76 | 0     |
| DSC1      | Q08554 | Desmocollin-1                                                    | 3.76 | 0     |
| HSP90AA5P | Q58FG0 | Putative heat shock protein HSP 90-alpha A5                      | 3.49 | 4.49  |
| FSCN1     | Q16658 | Fascin                                                           | 3.53 | 0.33  |
| SLC25A5   | P05141 | ADP/ATP translocase 2                                            | 3.63 | 0.49  |
| MAN2B1    | O00754 | Lysosomal alpha-mannosidase                                      | 4.46 | 0.49  |
| C1QTNF3   | Q9BXJ4 | Complement C1q tumor necrosis factor-related protein 3           | 3.58 | 0     |
| DES       | P17661 | Desmin                                                           | 4.23 | 0.34  |
| ALDH1A1   | P00352 | Retinal dehydrogenase 1                                          | 2.85 | 30.4  |
| RNH1      | P13489 | Ribonuclease inhibitor                                           | 2.94 | 8.94  |
| MXRA8     | Q9BRK3 | Matrix-remodeling-associated protein 8                           | 3.04 | 23.27 |
| MDH1      | P40925 | Malate dehydrogenase, cytoplasmic                                | 3.17 | 19.32 |
| UGDH      | O60701 | UDP-glucose 6-dehydrogenase                                      | 3.04 | 5.64  |
| CCT6A     | P40227 | T-complex protein 1 subunit zeta                                 | 2.94 | 8.07  |
| ACTR3     | P61158 | Actin-related protein 3                                          | 3.22 | 8.85  |
| PPP1CA    | P62136 | Serine/threonine-protein phosphatase PP1-alpha catalytic subunit | 3.22 | 6.81  |
| GPC1      | P35052 | Glypican-1                                                       | 3.31 | 4.77  |
| ATP6V0D1  | P61421 | V-type proton ATPase subunit d 1                                 | 3.08 | 5.65  |
| NSF       | P46459 | Vesicle-fusing ATPase                                            | 3.08 | 2.66  |
| RALA      | P11233 | Ras-related protein Ral-A                                        | 2.94 | 11.5  |
| GSTP1     | P09211 | Glutathione S-transferase P                                      | 3.13 | 3.45  |
| EIF4A1    | P60842 | Eukaryotic initiation factor 4A-I                                | 3.22 | 3.84  |
| POSTN     | Q15063 | Periostin                                                        | 4.05 | 0     |
| RAB5B     | P61020 | Ras-related protein Rab-5B                                       | 3.17 | 6.81  |
| SLC25A3   | Q00325 | Phosphate carrier protein, mitochondrial                         | 3.32 | 1.03  |
| HLA-B     | P30483 | HLA class I histocompatibility antigen, B-45 alpha chain         | 3.31 | 3.02  |
| STAT1     | P42224 | Signal transducer and activator of transcription 1-alpha/beta    | 2.94 | 0.82  |
| LEFTY2    | O00292 | Left-right determination factor 2                                | 4.33 | 0     |
| TSPAN6    | O43657 | Tetraspanin-6                                                    | 3.17 | 2.65  |
| VDAC1     | P21796 | Voltage-dependent anion-selective channel protein 1              | 3.13 | 0.82  |
| THY1      | P04216 | Thy-1 membrane glycoprotein                                      | 3.27 | 10.93 |
| MRGPRF    | Q96AM1 | Mas-related G-protein coupled receptor member F                  | 3.04 | 0     |
| KRT72     | Q14CN4 | Keratin, type II cytoskeletal 72                                 | 3.45 | 1.99  |
| RPLP0     | P05388 | 60S acidic ribosomal protein P0                                  | 3.45 | 0.33  |
| LOXL3     | P58215 | Lysyl oxidase homolog 3                                          | 3.73 | 0     |
| SLC25A4   | P12235 | ADP/ATP translocase 1                                            | 3.22 | 0     |
| CRYAB     | P02511 | Alpha-crystallin B chain                                         | 3.22 | 0     |
| FGD4      | Q96M96 | FYVE, RhoGEF and PH domain-containing protein 4                  | 3.08 | 1.01  |

|          |        |                                                                              |      |       |
|----------|--------|------------------------------------------------------------------------------|------|-------|
| ACO1     | P21399 | Cytoplasmic aconitate hydratase                                              | 2.73 | 33.29 |
| PGM1     | P36871 | Phosphoglucomutase-1                                                         | 2.54 | 11.13 |
| LTA4H    | P09960 | Leukotriene A-4 hydrolase                                                    | 2.82 | 9.85  |
| PFKL     | P17858 | 6-phosphofructokinase, liver type                                            | 2.54 | 8.75  |
| MTHFD1   | P11586 | C-1-tetrahydrofolate synthase, cytoplasmic                                   | 2.68 | 16.08 |
| CYFIP2   | Q96F07 | Cytoplasmic FMR1-interacting protein 2                                       | 2.63 | 10.72 |
| SERPINA7 | P05543 | Thyroxine-binding globulin                                                   | 3.23 | 12.53 |
| RRAS2    | P62070 | Ras-related protein R-Ras2                                                   | 2.54 | 7.67  |
| ASAH1    | Q13510 | Acid ceramidase                                                              | 3    | 7.66  |
| GSR      | P00390 | Glutathione reductase, mitochondrial                                         | 2.68 | 5.54  |
| UGP2     | Q16851 | UTP--glucose-1-phosphate uridylyltransferase                                 | 2.59 | 6.26  |
| ADH5     | P11766 | Alcohol dehydrogenase class-3                                                | 2.73 | 4.03  |
| CCT5     | P48643 | T-complex protein 1 subunit epsilon                                          | 2.63 | 5.79  |
| GLUD2    | P49448 | Glutamate dehydrogenase 2, mitochondrial                                     | 2.87 | 1.03  |
| LRPPRC   | P42704 | Leucine-rich PPR motif-containing protein, mitochondrial                     | 2.82 | 0     |
| SEPT7    | Q16181 | Septin-7                                                                     | 2.77 | 1.8   |
| UBR4     | Q5T4S7 | E3 ubiquitin-protein ligase UBR4                                             | 2.73 | 0.82  |
| ITIH1    | P19827 | Inter-alpha-trypsin inhibitor heavy chain H1                                 | 3    | 1.31  |
| TTN      | Q8WZ42 | Titin                                                                        | 2.82 | 2.2   |
| PDIA6    | Q15084 | Protein disulfide-isomerase A6                                               | 2.91 | 1.8   |
| HK1      | P19367 | Hexokinase-1                                                                 | 2.82 | 0.49  |
| RAP2B    | P61225 | Ras-related protein Rap-2b                                                   | 2.68 | 2.47  |
| NQO1     | P15559 | NAD(P)H dehydrogenase [quinone] 1                                            | 2.63 | 2.29  |
| ESYT2    | A0FGR8 | Extended synaptotagmin-2                                                     | 2.77 | 0.34  |
| KRT34    | O76011 | Keratin, type I cuticular Ha4                                                | 2.82 | 0.33  |
| DPYSL3   | Q14195 | Dihydropyrimidinase-related protein 3                                        | 2.77 | 0     |
| SND1     | Q7KZF4 | Staphylococcal nuclease domain-containing protein 1                          | 2.73 | 0.49  |
| PPP1R7   | Q15435 | Protein phosphatase 1 regulatory subunit 7                                   | 2.87 | 3.14  |
| FBLN5    | Q9UBX5 | Fibulin-5                                                                    | 3.6  | 1.98  |
| CPNE1    | Q99829 | Copine-1                                                                     | 3    | 4.82  |
| UGGT1    | Q9NYU2 | UDP-glucose:glycoprotein glucosyltransferase 1                               | 2.73 | 1.49  |
| EXOC4    | Q96A65 | Exocyst complex component 4                                                  | 2.54 | 1     |
| RPS3A    | P61247 | 40S ribosomal protein S3a                                                    | 2.68 | 1.16  |
| PLCB4    | Q15147 | 1-phosphatidylinositol-4,5-bisphosphate phosphodiesterase beta-4             | 2.82 | 0.83  |
| ETFA     | P13804 | Electron transfer flavoprotein subunit alpha, mitochondrial                  | 2.82 | 0     |
| PRDX4    | Q13162 | Peroxiredoxin-4                                                              | 2.77 | 0.49  |
| GNG12    | Q9UBI6 | Guanine nucleotide-binding protein G(I)/G(S)/G(O) subunit gamma-12           | 3    | 2.34  |
| DNAH10   | Q8IVF4 | Dynein heavy chain 10, axonemal                                              | 3.33 | 0.68  |
| CFL2     | Q9Y281 | Cofilin-2                                                                    | 2.72 | 5.33  |
| MYLK     | Q15746 | Myosin light chain kinase, smooth muscle                                     | 2.68 | 0     |
| ARG1     | P05089 | Arginase-1                                                                   | 3.1  | 0     |
| TMEM43   | Q9BTV4 | Transmembrane protein 43                                                     | 2.91 | 2.95  |
| COL16A1  | Q07092 | Collagen alpha-1(XVI) chain                                                  | 2.96 | 0     |
| XPO1     | O14980 | Exportin-1                                                                   | 2.77 | 0.67  |
| PTTG1IP  | P53801 | Pituitary tumor-transforming gene 1 protein-interacting protein              | 2.87 | 0.68  |
| SURF4    | O15260 | Surfeit locus protein 4                                                      | 2.68 | 0     |
| RAB13    | P51153 | Ras-related protein Rab-13                                                   | 2.68 | 0.82  |
| SFN      | P31947 | 14-3-3 protein sigma                                                         | 2.59 | 3.87  |
| MAGI1    | Q96QZ7 | Membrane-associated guanylate kinase, WW and PDZ domain-containing protein 1 | 3    | 1.65  |
| PDGFD    | Q9GZP0 | Platelet-derived growth factor D                                             | 3.28 | 1.46  |
| ARL6IP5  | O75915 | PRA1 family protein 3                                                        | 2.96 | 0     |
| CD151    | P48509 | CD151 antigen                                                                | 2.82 | 0     |

|           |        |                                                                               |      |       |
|-----------|--------|-------------------------------------------------------------------------------|------|-------|
| AMY2A     | P04746 | Pancreatic alpha-amylase                                                      | 3.06 | 62.36 |
| AMY2B     | P19961 | Alpha-amylase 2B                                                              | 3.06 | 54.55 |
| NCKAP1    | Q9Y2A7 | Nck-associated protein 1                                                      | 2.18 | 16.93 |
| ATP6V1H   | Q9UI12 | V-type proton ATPase subunit H                                                | 2.46 | 32.01 |
| PLS3      | P13797 | Plastin-3                                                                     | 2.28 | 16.57 |
| PTPRS     | Q13332 | Receptor-type tyrosine-protein phosphatase S                                  | 2.37 | 13.82 |
| AP2A2     | O94973 | AP-2 complex subunit alpha-2                                                  | 2.23 | 6.51  |
| DNAJA1    | P31689 | DnaJ homolog subfamily A member 1                                             | 2.23 | 7.19  |
| CAT       | P04040 | Catalase                                                                      | 2.55 | 7.99  |
| AKR1C3    | P42330 | Aldo-keto reductase family 1 member C3                                        | 2.28 | 9.85  |
| ATIC      | P31939 | Bifunctional purine biosynthesis protein PURH                                 | 2.32 | 5.8   |
| RHOC      | P08134 | Rho-related GTP-binding protein RhoC                                          | 2.23 | 11.58 |
| HSPB1     | P04792 | Heat shock protein beta-1                                                     | 2.18 | 9.03  |
| UQCRC2    | P22695 | Cytochrome b-c1 complex subunit 2, mitochondrial                              | 2.42 | 3.69  |
| POTEI     | P0CG38 | POTE ankyrin domain family member I                                           | 2.28 | 21.36 |
| RAB21     | Q9UL25 | Ras-related protein Rab-21                                                    | 2.28 | 3.33  |
| PRDX6     | P30041 | Peroxiredoxin-6                                                               | 2.23 | 9.69  |
| ARPC2     | O15144 | Actin-related protein 2/3 complex subunit 2                                   | 2.23 | 3.48  |
| GCN1L1    | Q92616 | Translational activator GCN1                                                  | 2.37 | 4.65  |
| RAB11B    | Q15907 | Ras-related protein Rab-11B                                                   | 2.42 | 5.77  |
| S100A9    | P06702 | Protein S100-A9                                                               | 2.6  | 17.46 |
| PDIA4     | P13667 | Protein disulfide-isomerase A4                                                | 2.37 | 0.68  |
| SPTBN1    | Q01082 | Spectrin beta chain, brain 1                                                  | 2.65 | 2.18  |
| PGAM4     | Q8N0Y7 | Probable phosphoglycerate mutase 4                                            | 2.46 | 4.99  |
| VDAC3     | Q9Y277 | Voltage-dependent anion-selective channel protein 3                           | 2.37 | 1.18  |
| OGDH      | Q02218 | 2-oxoglutarate dehydrogenase, mitochondrial                                   | 2.42 | 1.37  |
| CDC42     | P60953 | Cell division control protein 42 homolog                                      | 2.42 | 25    |
| TMED10    | P49755 | Transmembrane emp24 domain-containing protein 10                              | 2.56 | 0.33  |
| WARS      | P23381 | Tryptophanyl-tRNA synthetase, cytoplasmic                                     | 2.18 | 0.33  |
| ERLIN2    | O94905 | Erlin-2                                                                       | 2.37 | 0     |
| COPG      | Q9Y678 | Coatomer subunit gamma                                                        | 2.23 | 1.15  |
| ALDH2     | P05091 | Aldehyde dehydrogenase, mitochondrial                                         | 2.42 | 0.34  |
| AP2A1     | O95782 | AP-2 complex subunit alpha-1                                                  | 2.23 | 0.98  |
| RAB5A     | P20339 | Ras-related protein Rab-5A                                                    | 2.51 | 3.48  |
| SOD3      | P08294 | Extracellular superoxide dismutase [Cu-Zn]                                    | 2.92 | 1.64  |
| HSP90AB2P | Q58FF8 | Putative heat shock protein HSP 90-beta 2                                     | 2.42 | 5.29  |
| RAB23     | Q9ULC3 | Ras-related protein Rab-23                                                    | 2.23 | 0.33  |
| RPL7      | P18124 | 60S ribosomal protein L7                                                      | 2.56 | 0.82  |
| SPARC     | P09486 | SPARC                                                                         | 3.06 | 0     |
| TUFM      | P49411 | Elongation factor Tu, mitochondrial                                           | 2.32 | 0     |
| CPA4      | Q9UI42 | Carboxypeptidase A4                                                           | 2.32 | 0     |
| TGM2      | P21980 | Protein-glutamine gamma-glutamyltransferase 2                                 | 2.42 | 0     |
| EEF1G     | P26641 | Elongation factor 1-gamma                                                     | 2.42 | 0.49  |
| BCAP31    | P51572 | B-cell receptor-associated protein 31                                         | 2.32 | 0     |
| OXCT1     | P55809 | Succinyl-CoA:3-ketoacid-coenzyme A transferase 1, mitochondrial               | 2.42 | 0     |
| CNTNAP1   | P78357 | Contactin-associated protein 1                                                | 2.6  | 0     |
| CTSF      | Q9UBX1 | Cathepsin F                                                                   | 3.06 | 0     |
| ITGA5     | P08648 | Integrin alpha-5                                                              | 2.37 | 0     |
| GNS       | P15586 | N-acetylglucosamine-6-sulfatase                                               | 2.92 | 0.34  |
| PSMA5     | P28066 | Proteasome subunit alpha type-5                                               | 2.51 | 0     |
| NCEH1     | Q6PIU2 | Neutral cholesterol ester hydrolase 1                                         | 2.37 | 0     |
| ISLR      | O14498 | Immunoglobulin superfamily containing leucine-rich repeat protein             | 2.92 | 4.94  |
| RAC2      | P15153 | Ras-related C3 botulinum toxin substrate 2                                    | 2.46 | 3.31  |
| DDOST     | P39656 | Dolichyl-diphosphooligosaccharide--protein glycosyltransferase 48 kDa subunit | 2.37 | 0     |

|         |        |                                                                |      |      |
|---------|--------|----------------------------------------------------------------|------|------|
| PRNP    | P04156 | Major prion protein                                            | 2.79 | 0.67 |
| GSTO1   | P78417 | Glutathione S-transferase omega-1                              | 2.42 | 2.81 |
| ECM1    | Q16610 | Extracellular matrix protein 1                                 | 2.88 | 0    |
| TMED2   | Q15363 | Transmembrane emp24 domain-containing protein 2                | 2.37 | 0    |
| COL4A1  | P02462 | Collagen alpha-1(IV) chain                                     | 2.74 | 0    |
| S100A11 | P31949 | Protein S100-A11                                               | 2.65 | 1.72 |
| SULF2   | Q8IWU5 | Extracellular sulfatase Sulf-2                                 | 2.7  | 0    |
| PSMB2   | P49721 | Proteasome subunit beta type-2                                 | 2.42 | 1.46 |
| GPNMB   | Q14956 | Transmembrane glycoprotein NMB                                 | 2.74 | 0    |
| IFT122  | Q9HBG6 | Intraflagellar transport protein 122 homolog                   | 2.32 | 0.69 |
| HSPB6   | O14558 | Heat shock protein beta-6                                      | 2.23 | 0    |
| IGFBP5  | P24593 | Insulin-like growth factor-binding protein 5                   | 2.74 | 0    |
| GOLGB1  | Q14789 | Golgin subfamily B member 1                                    | 2.32 | 0    |
| ERGIC1  | Q969X5 | Endoplasmic reticulum-Golgi intermediate compartment protein 1 | 2.32 | 0    |
| ZBTB38  | Q8NAP3 | Zinc finger and BTB domain-containing protein 38               | 2.55 | 0.33 |
